# Supplementary material
Source: PubMed Central journal article supplement (PMC4383002)
Supplement: ncomms7614-s1.pdf [file ncomms7614-s1.pdf]

# Supplementary Figure 1

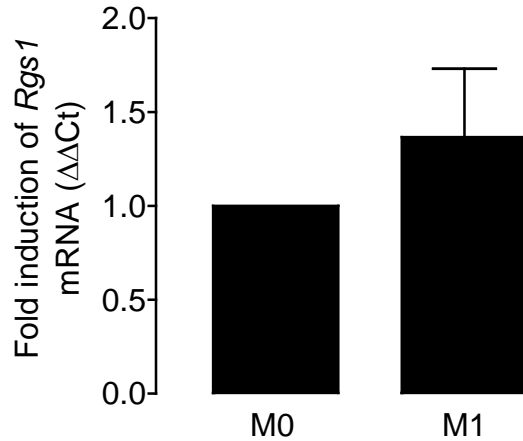

## **Supplementary Figure 1: *Rgs1* is expressed in human M1-polarised macrophages.**

Human CD14<sup>+</sup> monocytes were obtained from healthy human peripheral blood after monocyte isolation using magnetic separation (Miltenyi Biotec). Macrophages were obtained by culturing monocytes for 6 days then cultured for an additional 24 hours with or without 100 ng/ml LPS and 20 ng/ml IFN- $\gamma$  (for M1 polarization). qRT-PCR analysis of *Rgs1* mRNA in M1 macrophages presented relative to mRNA in unstimulated cells (M0). (n=4).

## Supplementary Figure 2

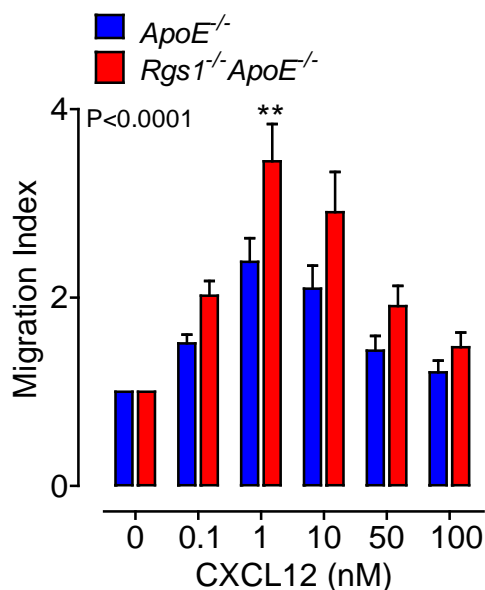

### Supplementary Figure 2: RGS1 inhibits splenocyte migration to CXCL12.

Migration of splenocytes from *ApoE*<sup>-/-</sup> and *Rgs1*<sup>-/-</sup> *ApoE*<sup>-/-</sup> mice through a 5  $\mu$ m filter towards increasing concentrations of recombinant murine CXCL12 placed in the lower chamber of a Boyden chamber. Splenocytes ( $4 \times 10^5$  cells) were isolated after hypotonic lysis of red blood cells. Following a 3 hour incubation at 37°C, the number of cells that migrated into the lower chamber was determined by the CellTiter-Glo® luminescent cell viability assay (Promega, UK). Quantification of migration is presented relative to results of untreated cells, set as 1. RPMI media was used as a negative control. Graphs indicate migration index  $\pm$  s.e.m for each treatment group in triplicate (n=10 per group). There was a significant difference between the two genotypes, P<0.0001 calculated by 2-way ANOVA. \*\*, P<0.01 at 1 nM CXCL12, calculated by Bonferroni post-test.

# Supplementary Figure 3

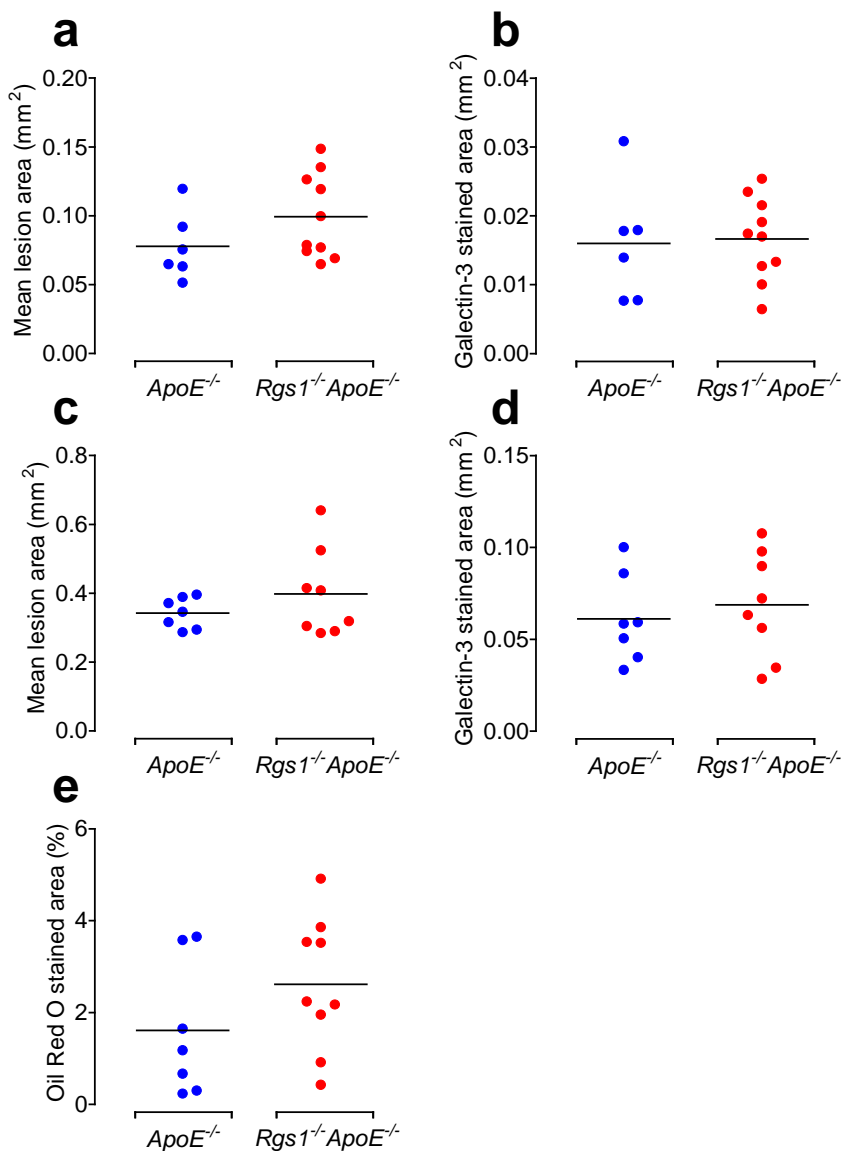

## Supplementary Figure 3: *Rgs1* deficiency does not affect atherosclerosis and macrophage content in 16 week old and western-type diet fed *ApoE*<sup>-/-</sup> mice.

(a) Atherosclerotic plaque in the aortic roots of 16-week old mice on a chow diet. (b) Galectin-3 positive macrophage content in the aortic roots of 16-week old mice on a chow diet. (c) Atherosclerotic plaque in the aortic roots of 16-week old mice on a western-type diet for 8 weeks. (d) Galectin-3 positive macrophage content in the aortic roots of 16-week old mice on a western-type diet for 8 weeks. (e) *En face* atherosclerotic plaque in the aortas of 16-week old mice on a western-type diet for 8 weeks. Each symbol represents an individual mouse (n=6-10). Values are expressed as mean ± s.e.m. There were no significant differences between groups.

# Supplementary Figure 4

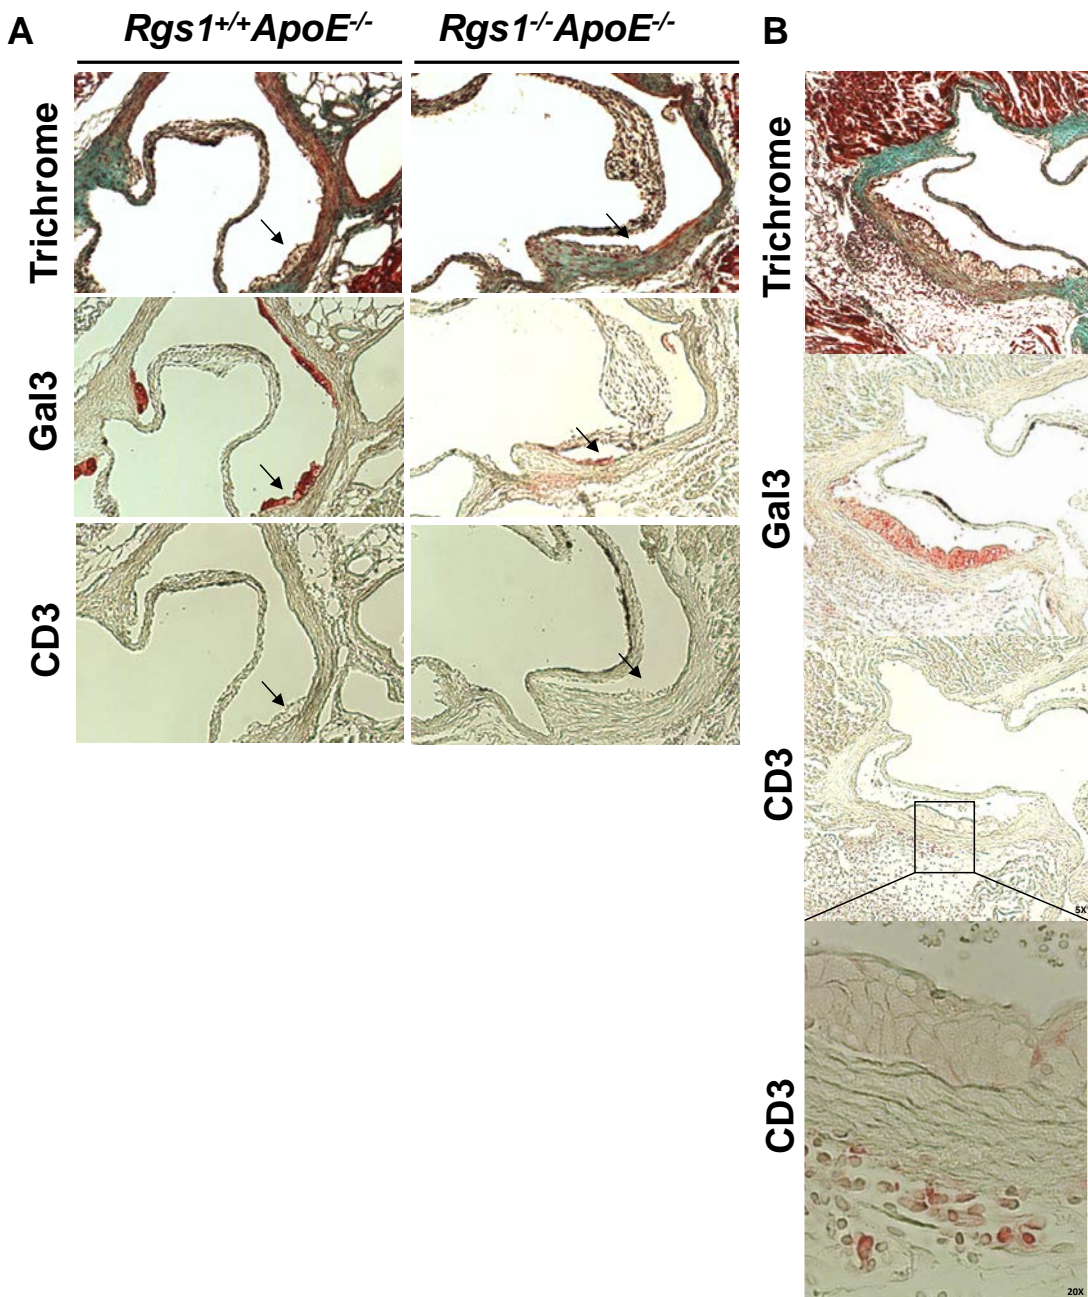

**Supplementary Figure 4: Histological analysis of CD3 T-cell staining of aortic roots from *Rgs1<sup>+/+</sup>ApoE<sup>-/-</sup>* and *Rgs1<sup>-/-</sup>ApoE<sup>-/-</sup>* mice.** (A) Representative images of aortic root sections from 9 week old *Rgs1<sup>+/+</sup>ApoE<sup>-/-</sup>* and *Rgs1<sup>-/-</sup>ApoE<sup>-/-</sup>* mice on a chow diet that were stained for Masson's Trichrome for lesion analysis, Galectin-3 for macrophage content and CD3 for T-cells. No significant CD3 staining was observed in aortic roots at 9 weeks. *Rgs1* deficient mice had smaller, or no lesions compared to *ApoE<sup>-/-</sup>* mice at this stage. (B) Confirmation of positive CD3 staining in the adventitia behind aortic root lesions of 16 week old mice on a chow diet. Representative images of aortic root sections from an *ApoE<sup>-/-</sup>* mouse on a chow diet for 16 weeks, that were stained for Masson's Trichrome for lesion analysis, Galectin-3 for macrophage content and CD3 for T-cells.

# Supplementary Figure 5

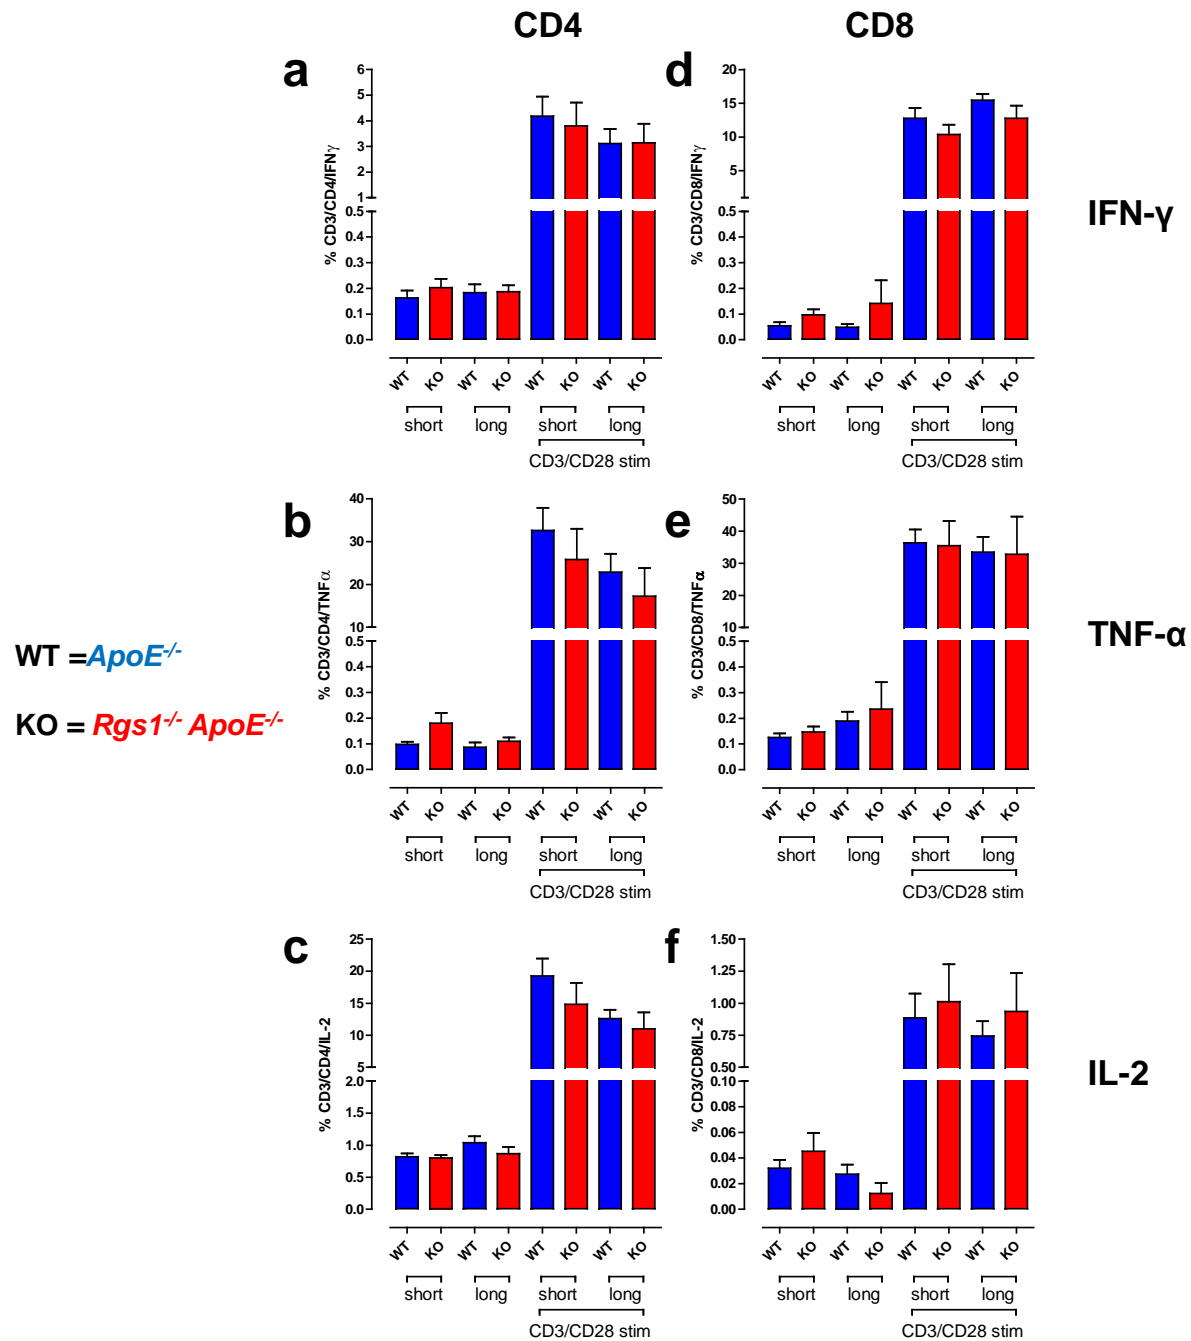

## Supplementary Figure 5: *Rgs1* deficiency does not affect a Th1 cell phenotype.

Splenocytes ( $3 \times 10^6$  cells) were isolated after hypotonic lysis of red blood cells and incubated for 4 hours (short) or overnight (long) with anti-CD3/CD28 co-stimulation at 37°C. Cells were centrifuged, washed and then stained with live/dead fixable stain (Life Technologies) then incubated in cell surface specific antibodies and Fc block. For staining of intracellular markers, cells were washed, permeabilised by incubation with Cytofix/Cytoperm then washed in PermWash (BD Biosciences). The percentage of Th1 cytokines; IFN- $\gamma$ , TNF- $\alpha$  and IL-2 expressing (a-c) CD4 and (d-f) CD8 cells were quantified by flow cytometry (n=4 per group). Values are expressed as mean  $\pm$  s.e.m. There were no significant differences between the two genotypes.

# Supplementary Figure 6

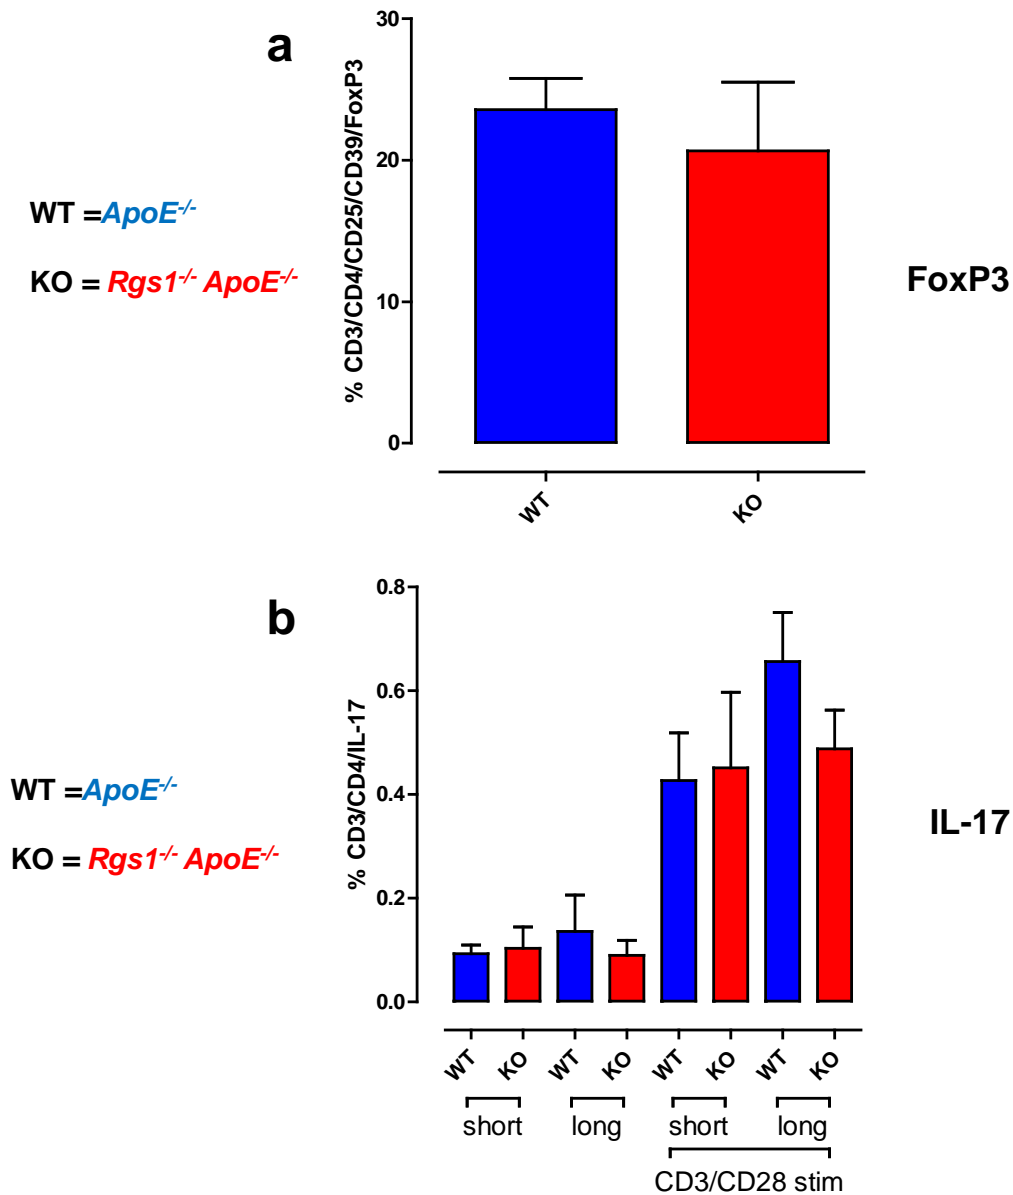

## Supplementary Figure 6: *Rgs1* deficiency does not affect a Treg cell and Th17 cell phenotype.

Splenocytes ( $3 \times 10^6$  cells) were isolated after hypotonic lysis of red blood cells and (a) the percentage of FoxP3 expressing CD39+CD25+CD4+CD3+ cells were quantified by flow cytometry (n=4 per group) (b) incubated for 4 hours (short) or overnight (long) with anti-CD3/CD28 stimulation at 37°C. Cells were centrifuged, washed and then stained with live/dead fixable stain (Life Technologies) then incubated in cell surface specific antibodies and Fc block. For staining of intracellular markers, cells were washed, permeabilised by incubation with Cytofix/Cytoperm then washed in PermWash (BD Biosciences). The percentage of IL-17 expressing CD4+CD3+ cells were quantified by flow cytometry (n=4 per group). Values are expressed as mean  $\pm$  s.e.m. There were no significant differences between the two genotypes.

## Supplementary Figure 7

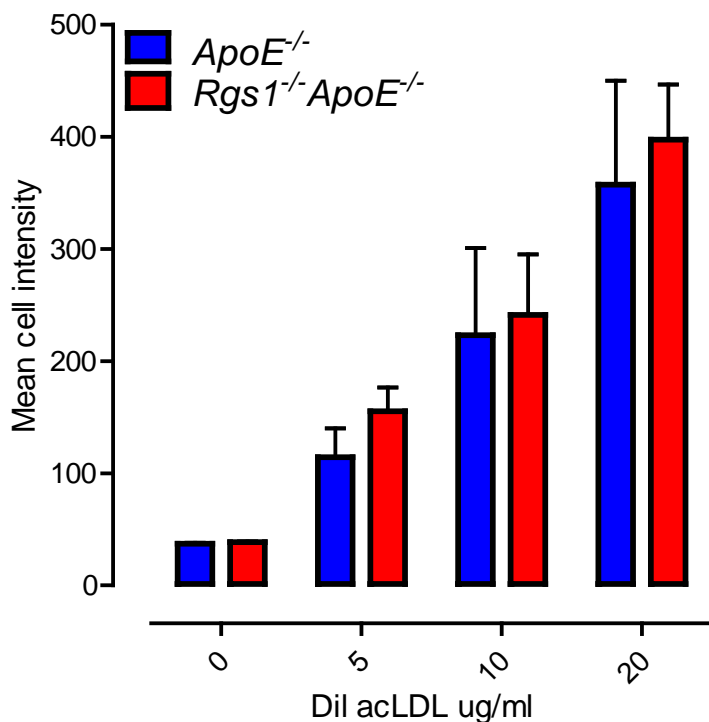

### **Supplementary Figure 7: RGS1 deficiency does not affect foam cell formation.**

Bone marrow derived macrophages ( $1 \times 10^5$  cells) from *ApoE*<sup>-/-</sup> and *Rgs1*<sup>-/-</sup> *ApoE*<sup>-/-</sup> mice were cultured for 7 days prior to treatment with 5, 10 and 20 ug/ml Dil-acLDL for 24 hours. Quantification of LDL uptake was measured by fluorescent intensity per cell over 5 fields per well using the Operetta High Content Imaging System. Graphs indicate mean cell intensity  $\pm$  s.e.m for each dose in quadruplicate (n=3 per group, representative of two separate experiments). There were no significant differences between groups.

# Supplementary Figure 8

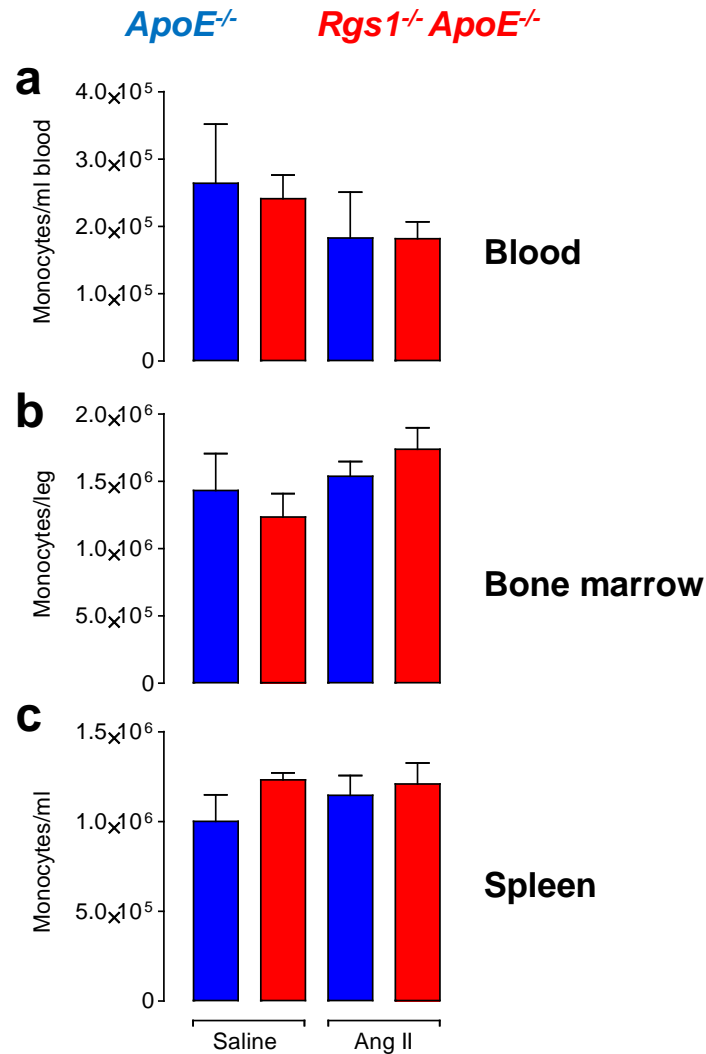

## Supplementary Figure 8: *Rgs1* deficiency does not affect monocyte numbers in the blood, bone marrow or spleen of *ApoE*<sup>-/-</sup> mice after Ang II infusion.

Leukocyte counts from (a) blood, (b) bone marrow and (c) spleen in 9 week old *ApoE*<sup>-/-</sup> and *Rgs1*<sup>-/-</sup> *ApoE*<sup>-/-</sup> mice after 14 days of Ang II infusion at 0.8 mg/kg/day. Monocytes from indicated tissues were quantified by flow cytometry and identified as CD11b<sup>+</sup>Ly6G<sup>-</sup>7/4<sup>hi</sup> cells. There was no overall significant effect of *Rgs1* deficiency on monocyte numbers in the blood, bone marrow or spleen (n=2-3 for saline and 7-13 for Ang II per group). Values are expressed as mean ± s.e.m.



## Supplementary Figure 9

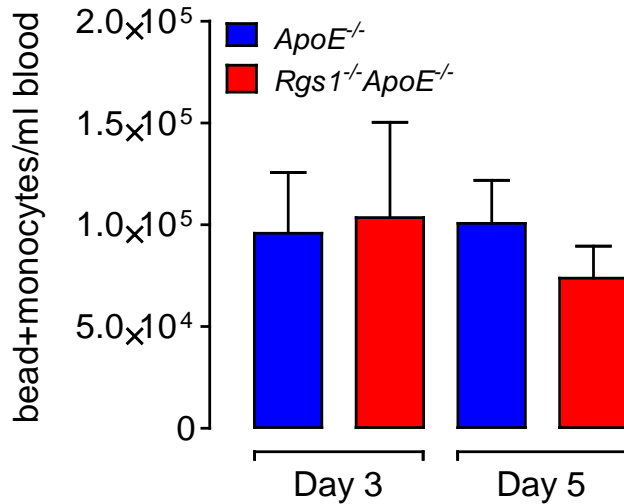

**Supplementary Figure 9: *Rgs1* deficiency does not affect inflammatory monocyte numbers in the blood after Ang II infusion.**

*ApoE*<sup>-/-</sup> and *Rgs1*<sup>-/-</sup> *ApoE*<sup>-/-</sup> mice received Ang II infusion at 0.8 mg/kg/day for 3 and 5 days following fluorescent bead labeling of circulating inflammatory monocytes. The numbers of bead labeled circulating 7/4<sup>hi</sup> monocytes at day 3 and day 5 were quantified by flow cytometry (n=5-7 per group). Monocytes were identified as CD45<sup>+</sup>CD11b<sup>+</sup>7/4<sup>hi</sup> cells. Values are expressed as mean ± s.e.m.

# Supplementary Table 1

| Genbank   | Name                                                   | Change in expression of gene in thoracic aorta between 8 and 16 weeks |          |
|-----------|--------------------------------------------------------|-----------------------------------------------------------------------|----------|
|           |                                                        | Fold Change                                                           | P value  |
| NM_009263 | Spp1                                                   | 24.88                                                                 | 0.000133 |
| NM_008491 | Lcn2                                                   | 3.52                                                                  | 0.000292 |
| NM_011333 | Ccl2                                                   | 3.53                                                                  | 0.000392 |
| NM_010444 | Nr4a1                                                  | 0.45                                                                  | 0.00043  |
| NM_011593 | Timp1                                                  | 2.38                                                                  | 0.0011   |
| NM_172750 | Adprhl1                                                | 0.49                                                                  | 0.00139  |
| NM_153122 | Oplah                                                  | 0.68                                                                  | 0.00206  |
| NM_008764 | Tnfrsf11b                                              | 2.11                                                                  | 0.00213  |
| NM_021455 | Mxlpl                                                  | 0.54                                                                  | 0.00512  |
| NM_015811 | Rgs1                                                   | 1.74                                                                  | 0.00512  |
| NM_007734 | Col4a3                                                 | 0.55                                                                  | 0.00675  |
| NM_025999 | Rnf141                                                 | 0.69                                                                  | 0.00749  |
| NM_011251 | Rbm6                                                   | 1.24                                                                  | 0.00749  |
| NM_023124 | H2-Q8                                                  | 0.39                                                                  | 0.0075   |
| NM_024221 | Pdhh                                                   | 0.57                                                                  | 0.00908  |
| NM_021400 | Prg4                                                   | 5.77                                                                  | 0.00908  |
| NM_018884 | Pdzrn3                                                 | 1.39                                                                  | 0.0113   |
| NM_010391 | H2-Q10                                                 | 0.30                                                                  | 0.0122   |
| NM_010391 | H2-Q10                                                 | 0.34                                                                  | 0.0122   |
| Poln      | DNA polymerase N                                       | 0.40                                                                  | 0.0122   |
| NM_022322 | Tnmd                                                   | 0.42                                                                  | 0.0122   |
|           | Tmem120b (LOC330189)                                   | 0.53                                                                  | 0.0122   |
| NM_024446 | Nudt7                                                  | 0.58                                                                  | 0.0122   |
|           | SIMILAR TO GALE                                        | 0.72                                                                  | 0.0122   |
|           | Adipor2                                                | 0.72                                                                  | 0.0122   |
| NM_009427 | Tob1                                                   | 0.76                                                                  | 0.0122   |
| NM_011570 | Tes                                                    | 1.47                                                                  | 0.0122   |
| NM_011511 | Abcc9                                                  | 1.53                                                                  | 0.0122   |
|           | CSMD2                                                  | 2.10                                                                  | 0.0122   |
| NM_021281 | Ciss                                                   | 4.03                                                                  | 0.0122   |
| NM_028069 | Mucdhl                                                 | 0.71                                                                  | 0.0137   |
| NM_013473 | Anxa8                                                  | 2.43                                                                  | 0.0154   |
| NM_008409 | Itm2a                                                  | 0.49                                                                  | 0.0166   |
| NM_153508 | Cistn3                                                 | 0.50                                                                  | 0.0169   |
| NM_139292 | Reep6                                                  | 0.62                                                                  | 0.0185   |
| NM_030210 | Aacs                                                   | 0.62                                                                  | 0.0185   |
| NM_133891 | Slc44a1                                                | 0.72                                                                  | 0.0185   |
| NM_144784 | Acat1                                                  | 0.78                                                                  | 0.0185   |
| NM_007920 | Elf1                                                   | 1.28                                                                  | 0.0185   |
| NM_009423 | Traf4                                                  | 0.74                                                                  | 0.0191   |
|           | ECMR-III                                               | 1.60                                                                  | 0.0191   |
| NM_011693 | Vcam1                                                  | 2.50                                                                  | 0.0191   |
| NM_025297 | Mecr                                                   | 0.64                                                                  | 0.0195   |
| NM_011620 | Tnnt3                                                  | 11.57                                                                 | 0.0196   |
| NM_008284 | Hras1                                                  | 0.49                                                                  | 0.0197   |
| NM_013935 | Ptpla                                                  | 0.69                                                                  | 0.0197   |
|           | FLAVOHEMOPROTEIN B5/B5R.                               | 1.32                                                                  | 0.0201   |
| NM_022019 | Dusp10                                                 | 0.69                                                                  | 0.0203   |
| NM_009760 | Bnip3                                                  | 0.77                                                                  | 0.021    |
| NM_053200 | ESTERASE- 22                                           | 0.49                                                                  | 0.0214   |
| NM_007751 | Cox8b                                                  | 0.39                                                                  | 0.022    |
|           | P56-LCK                                                | 0.41                                                                  | 0.022    |
| NM_019811 | Acss2                                                  | 0.54                                                                  | 0.022    |
|           | OROSMUCOID 3                                           | 0.57                                                                  | 0.022    |
|           | SIMILAR TO GLUTAMIC-PYRUVATE TRANSAMINASE              | 0.57                                                                  | 0.022    |
| NM_009948 | Cpt1b                                                  | 0.59                                                                  | 0.022    |
| NM_009171 | Shmt1                                                  | 0.60                                                                  | 0.022    |
| NM_024450 | Scd3                                                   | 0.65                                                                  | 0.022    |
| NM_025369 | Mrps36                                                 | 0.78                                                                  | 0.022    |
| NM_023813 | Carrk2d                                                | 1.24                                                                  | 0.022    |
| NM_031256 | Plekha3                                                | 1.32                                                                  | 0.022    |
| NM_030690 | Rai14                                                  | 1.33                                                                  | 0.022    |
| NM_026835 | Ms4a6d                                                 | 2.27                                                                  | 0.022    |
| NM_011693 | Vcam1                                                  | 2.33                                                                  | 0.022    |
| NM_009252 | Serpina3n                                              | 2.39                                                                  | 0.022    |
| NM_009196 | Slc16a1                                                | 0.60                                                                  | 0.0221   |
| NM_016895 | Ak2                                                    | 0.72                                                                  | 0.0221   |
| NM_026769 | Drd1ip                                                 | 0.47                                                                  | 0.0223   |
| NM_019760 | Serinc1                                                | 1.26                                                                  | 0.0223   |
| NM_019391 | Lsp1                                                   | 1.53                                                                  | 0.0223   |
|           | Crlf-1 Acc:Q9D2R5                                      | 2.03                                                                  | 0.0223   |
| NM_031180 | Klb                                                    | 0.50                                                                  | 0.0232   |
| NM_007654 | Cd72                                                   | 2.01                                                                  | 0.0232   |
| NM_016754 | Mylpf                                                  | 6.08                                                                  | 0.0232   |
| NM_011315 | Saa3                                                   | 6.51                                                                  | 0.0232   |
|           | SIMILAR TO OUT AT FIRST PROTEIN (HYPOTHETICAL PROTEIN) | 0.70                                                                  | 0.0246   |
| NM_007639 | Cd1d1                                                  | 0.51                                                                  | 0.0248   |
| NM_173007 | Tspan12                                                | 0.55                                                                  | 0.0259   |
| NM_009982 | Ctsc                                                   | 1.31                                                                  | 0.0259   |
| NM_011890 | Sgcb                                                   | 1.25                                                                  | 0.0275   |
| NM_020025 | B3galt2                                                | 0.50                                                                  | 0.0276   |
| NM_008452 | Klf2                                                   | 0.63                                                                  | 0.0278   |
| NM_017398 | Diap2                                                  | 1.34                                                                  | 0.0287   |
| NM_010819 | Clec4d                                                 | 2.76                                                                  | 0.0287   |
| NM_144961 | MYOSIN HEAVY CHAIN 2A                                  | 25.39                                                                 | 0.0287   |
|           | TCR BETA-2 CHAIN C REGION                              | 0.37                                                                  | 0.0294   |
|           | NGAL Acc:P11672]                                       | 2.58                                                                  | 0.03     |
| NM_145570 | BC014699                                               | 0.66                                                                  | 0.0307   |
| NM_013654 | Ccl7                                                   | 2.27                                                                  | 0.0307   |
| NM_030888 | C1qtnf3                                                | 0.49                                                                  | 0.0309   |
| NM_153779 | Amid                                                   | 0.61                                                                  | 0.0309   |

|           |                                                                    |      |        |
|-----------|--------------------------------------------------------------------|------|--------|
| NM_009204 | Slc2a4                                                             | 0.62 | 0.0309 |
| NM_026981 | Dtwd1                                                              | 1.28 | 0.0309 |
| NM_173413 | Rab8b                                                              | 1.37 | 0.0311 |
| NM_130450 | Elov6                                                              | 0.44 | 0.0314 |
| NM_029844 | Mrap                                                               | 0.54 | 0.0314 |
| NM_026443 | 1700020C11Rik                                                      | 0.64 | 0.0335 |
| NM_011353 | Serf1                                                              | 0.70 | 0.0335 |
| NM_138597 | Atp5o                                                              | 0.81 | 0.0335 |
| NM_025375 | Wbscr22                                                            | 1.31 | 0.0335 |
| NM_176919 | Ppm1h                                                              | 1.37 | 0.0354 |
|           | TRANSCRIPTIONAL REPRESSOR PAR-4-LIKE PROTEIN PAWR (FRAGMENT).      | 1.57 | 0.0354 |
| NM_011331 | Ccl12                                                              | 3.02 | 0.0354 |
| NM_026071 | Slc25a19                                                           | 0.74 | 0.0373 |
| NM_020519 | Slurp1                                                             | 3.03 | 0.038  |
| NM_019584 | Becn1                                                              | 1.27 | 0.0381 |
| NM_008604 | Mme                                                                | 0.60 | 0.0383 |
| NM_029620 | Pcolce2                                                            | 0.70 | 0.0383 |
| NM_028017 | NAPG                                                               | 1.32 | 0.0383 |
| NM_022992 | Arl6ip5                                                            | 1.31 | 0.039  |
| NM_009669 | Amy2                                                               | 0.62 | 0.0391 |
| NM_013532 | Lilrb4                                                             | 3.09 | 0.0392 |
| NM_007544 | Bid                                                                | 1.30 | 0.04   |
| NM_032002 | Nrg4                                                               | 0.46 | 0.0409 |
| NM_019744 | Ncoa4                                                              | 1.41 | 0.0411 |
| NM_009779 | C3ar1                                                              | 2.16 | 0.0416 |
| NM_008797 | Pcx                                                                | 0.50 | 0.0417 |
| NM_017379 | Tuba8                                                              | 0.56 | 0.0417 |
| NM_146125 | Itpka                                                              | 0.59 | 0.042  |
| NM_177034 | Apba1                                                              | 1.28 | 0.042  |
| NM_008845 | Pip5k2a                                                            | 1.40 | 0.042  |
| NM_025348 | Ndufa3                                                             | 0.77 | 0.0429 |
| NM_020582 | Atp5j2                                                             | 0.70 | 0.0434 |
| NM_026840 | Pdgfrr1                                                            | 0.65 | 0.0438 |
| NM_022332 | St7                                                                | 0.86 | 0.0438 |
| NM_025843 | Ndufb7                                                             | 0.92 | 0.0438 |
| NM_023665 | D4Wsu53e                                                           | 1.60 | 0.0438 |
| NM_007590 | Calm3                                                              | 1.20 | 0.044  |
| NM_031254 | Trem2                                                              | 3.15 | 0.044  |
| NM_009115 | S100b                                                              | 0.64 | 0.0459 |
| NM_153799 | Lsm16                                                              | 0.80 | 0.0459 |
| NM_010781 | Mcpt6                                                              | 0.72 | 0.0463 |
| NM_009367 | Tgfb2                                                              | 1.42 | 0.0463 |
| NM_053110 | Gpnmb                                                              | 4.33 | 0.0463 |
| NM_011281 | Rorc                                                               | 0.52 | 0.0465 |
| NM_024208 | Echdc3                                                             | 0.73 | 0.0465 |
| NM_138601 | D10Jhu81e                                                          | 0.74 | 0.0465 |
| NM_019640 | Pitpnb                                                             | 1.33 | 0.0465 |
| NM_145575 | Cald1                                                              | 1.92 | 0.0465 |
| NM_007703 | Elov3                                                              | 0.39 | 0.048  |
| NM_145122 | Pex16                                                              | 0.71 | 0.0495 |
|           | CYSTEINE-RICH REPEAT-CONTAINING PROTEIN CRIM1 PRECURSOR (FRAGMENT) | 1.54 | 0.0495 |
| NM_011176 | St14                                                               | 1.30 | 0.0496 |
| NM_144539 | Slamf7                                                             | 2.83 | 0.0496 |
|           | XAP-5-LIKE PROTEIN                                                 | 0.41 | 0.0499 |
| NM_011585 | Tia1                                                               | 1.37 | 0.0499 |
| NM_025427 | 1190002H23Rik                                                      | 0.56 | 0.05   |
| NM_134046 | 2810429O05Rik                                                      | 0.68 | 0.05   |
|           | C8g                                                                | 0.75 | 0.05   |
| NM_025930 | 2600011C06Rik                                                      | 1.24 | 0.05   |

**Supplementary Table 1: Regulated genes in thoracic aortas of 16 week old *ApoE*<sup>-/-</sup> mice fed a western type diet compared to 8 week old *ApoE*<sup>-/-</sup> mice.**

Gene expression was measured using a whole mouse gene array. Statistical analysis was performed using GeneSpring software with correction for multiple comparisons. 150 genes showed significantly different expression in the 16 week old mice compared to 8 week old *ApoE*<sup>-/-</sup> mice, P value<0.05. 16 of these genes including RGS1 were differentially expressed with a P value<0.01.

## Supplementary Table 2

|                                                | <i>ApoE</i> <sup>-/-</sup> | <i>Rgs1</i> <sup>-/-</sup> <i>ApoE</i> <sup>-/-</sup> |
|------------------------------------------------|----------------------------|-------------------------------------------------------|
| <b>Blood (cells x10<sup>4</sup>/ml)</b>        |                            |                                                       |
| Monocytes                                      | 8.09 ±3.65                 | 5.77 ±1.71                                            |
| Neutrophils                                    | 13.37 ±7.10                | 14.13 ±2.48                                           |
| CD3 T cells                                    | 41.10 ±14.61               | 57.48 ±18.70                                          |
| CD4 T cells                                    | 22.86 ±9.37                | 30.13 ±6.91                                           |
| CD8 T cells                                    | 12.11 ±5.94                | 17.5 ±6.23                                            |
| B cells                                        | 65.85 ±18.37               | 66.45 ±18.35                                          |
| <b>Bone marrow (cells x10<sup>6</sup>/leg)</b> |                            |                                                       |
| Monocytes                                      | 0.38 ±0.19                 | 0.53 ±0.28                                            |
| Neutrophils                                    | 2.65 ±1.15                 | 2.89 ±1.74                                            |
| CD3 T cells                                    | 0.18 ±0.11                 | 0.17 ±0.08                                            |
| CD4 T cells                                    | 0.06 ±0.04                 | 0.05 ±0.02                                            |
| CD8 T cells                                    | 0.06 ±0.01                 | 0.07 ±0.01                                            |
| B cells                                        | 0.86 ±0.08                 | 0.93 ±0.68                                            |
| <b>Spleen (cells x 10<sup>5</sup>/ml)</b>      |                            |                                                       |
| Monocytes                                      | 2.35 ±1.20                 | 1.19 ±0.56 *                                          |
| Neutrophils                                    | 4.80 ±1.81                 | 3.31 ±1.85                                            |
| CD3 T cells                                    | 22.56 ±5.63                | 23.30 ±5.27                                           |
| CD4 T cells                                    | 16.98 ±4.35                | 16.26 ±4.27                                           |
| CD8 T cells                                    | 4.22 ±1.34                 | 5.60 ±2.68                                            |
| B cells                                        | 27.58 ±12.11               | 21.88 ±11.08                                          |

### Supplementary Table 2: *Rgs1* deficiency does not affect homeostatic cell numbers in the blood or bone marrow of *ApoE*<sup>-/-</sup> mice.

Leukocyte counts from blood, bone marrow and spleen in 9 week old *ApoE*<sup>-/-</sup> and *Rgs1*<sup>-/-</sup> *ApoE*<sup>-/-</sup> mice on a chow diet were quantified by flow cytometry. Monocytes were identified as CD11b<sup>+</sup>Ly6G<sup>-</sup>7/4<sup>hi</sup> cells and neutrophils as CD11b<sup>+</sup>Ly6G<sup>+</sup>7/4<sup>hi</sup> cells. T cells were identified as CD3<sup>+</sup> cells, then CD4 or CD8 T cells and B cells were identified as B220<sup>+</sup> cells. There was no overall significant effect of *Rgs1* deficiency on cell numbers in the blood or bone marrow but a difference in monocytes in the spleen (n=5-8 per group). Values are expressed as mean ± s.d. \*P <0.05 calculated using the Students t-test.

## Supplementary Table 3

| <b>Gene</b>          | <b>Reference Sequence<br/>Accession no.</b> | <b>ABI product number</b> |
|----------------------|---------------------------------------------|---------------------------|
| Mouse Rgs1           | NM_015811.2                                 | Mm01286234_g1             |
| Mouse Cd68           | NM_009853.1                                 | Mm00839636_g1             |
| Human Rgs1           | NM_002922.3                                 | Hs00175260_m1             |
| Human GAPDH          | NM_002046.3                                 | Hs02758991_g1             |
| Mouse $\beta$ -actin | N/A                                         | 4352341E                  |

### **Supplementary Table 3: Primers for qRT-PCR**

All assays used in qRT-PCR are listed with accession numbers and product number. All TaqMan<sup>®</sup> probes were designed and optimized by Applied Biosystems (ABI; Warrington, UK). All are commercial products; sequences not available.

# Supplementary Table 4

| <b>Name</b>                                              | <b>Concentration</b> | <b>Product number</b> | <b>Supplier</b>      |
|----------------------------------------------------------|----------------------|-----------------------|----------------------|
| Goat polyclonal anti-mouse Galectin-3 antibody           | 1:500                | AF1197                | R&D Systems          |
| Rabbit polyclonal anti-human CD-3 antibody               | 1:100                | A0452                 | Dako                 |
| Mouse Monoclonal $\alpha$ -Smooth muscle actin clone 1A4 | 1:50                 | A-5691                | Sigma-Aldrich        |
| Biotinylated anti-goat IgG                               | 1:200                | BA-5000               | Vector Labs          |
| Biotinylated anti-rabbit IgG                             | 1:200                | BA-1000               | Vector Labs          |
| Alexa Fluor® 568 Goat Anti-Rat IgG                       | 1:500                | A-11077               | Life<br>Technologies |

**Supplementary Table 4: Antibodies used in immunohistochemical staining**

# Supplementary Table 5

| Target       | Conjugate            | Clone    | Working Concentration | Product number | Supplier       |
|--------------|----------------------|----------|-----------------------|----------------|----------------|
| CD16/CD32    | purified             | 2.4G2    | 5 µg/ml               | 553142         | BD Biosciences |
| CD11b        | PerCP Cy5.5          | M1/70    | 1 µg/ml               | 550993         | BD Biosciences |
| Ly6B.2 (7/4) | PE                   | 7/4      | 2 µg/ml               | MCA771PE       | AbD Serotec    |
| Ly6G         | FITC                 | 1A8      | 2.5 µg/ml             | 551460         | BD Biosciences |
| B220         | PE                   | RA3-6B2  | 1 µg/ml               | 553089         | BD Biosciences |
| B220         | PE-Texas Red         | RA3-6B2  | 0.7 µg/ml             | 551489         | BD Biosciences |
| CD3          | Pacific Blue         | 500A2    | 1 µg/ml               | 558214         | BD Biosciences |
| CD3          | Per CP Cy5.5         | 145-2c11 | 1 µg/ml               | 45-0031-82     | eBioscience    |
| CD3          | Alexa Fluor 700      | 17A2     | 1.25 µg/ml            | 100216         | Biolegend      |
| CD4          | Alexa Fluor 647      | RM4-5    | 1 µg/ml               | 557681         | BD Biosciences |
| CD4          | efluor 650 NC        | GK1.5    | 2 µg/ml               | 95-0041-42     | eBioscience    |
| CD8          | FITC                 | 53-6.7   | 1 µg/ml               | 553030         | BD Biosciences |
| CD8          | APC-ef780            | 53-6.7   | 2 µg/ml               | 47-0081-82     | eBioscience    |
| CD45         | PE-Cy7               | 30-F11   | 1 µg/ml               | 552848         | BD Biosciences |
| CD14         | PE                   | Sa2-8    | 0.25 µg/ml            | 12-0141-81     | eBioscience    |
| CCR2         | APC                  | 475301   | 0.2 µg/ml             | FAB5538A       | R&D Systems    |
| CCR5         | PE                   | HM-CCR5  | 2 µg/ml               | 107005         | Biolegend      |
| IFN-γ        | Brilliant violet 421 | XMG1.2   | 0.25 µg/ml            | 505829         | Biolegend      |
| TNF-α        | FITC                 | MP6-XT22 | 2.5 µg/ml             | 53-7321-82     | eBioscience    |
| IL-2         | Pe-Cy7               | JES6-5H4 | 1 µg/ml               | 25-7021-82     | eBioscience    |
| IL-17a       | Per CP Cy5.5         | eBio17B7 | 3 µg/ml               | 45-7177-82     | eBioscience    |
| CD25         | APC                  | PC61.5   | 0.5 µg/ml             | 17-0251-82     | eBioscience    |
| CD39         | Pe-Cy7               | 24DMS1   | 2 µg/ml               | 25-0391-82     | eBioscience    |
| FoxP3        | PE                   | FJK-16S  | 2 µg/ml               | 12-5773-82     | eBioscience    |

**Supplementary Table 5: Antibodies used for flow cytometry**
